# Supplementary material for: Antiviral Susceptibilities of Distinct Lineages of Influenza C and D Viruses
Source: MDPI journal article supplement (doi:10.3390/v15010244), 2023-01-15
Supplement: s1 [file s1]

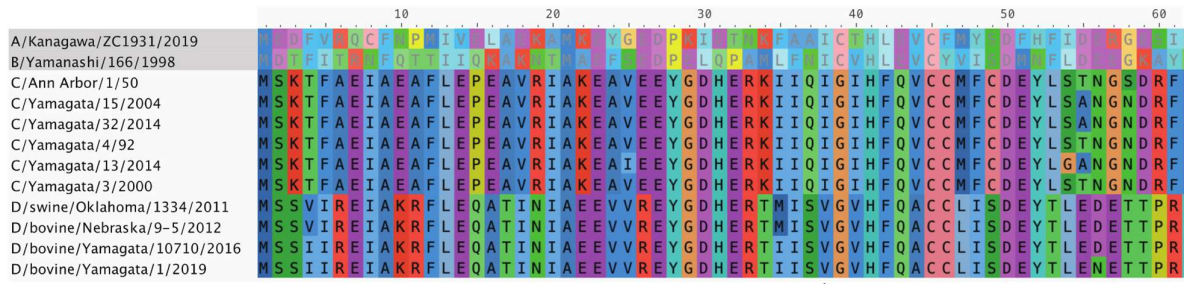

(a)

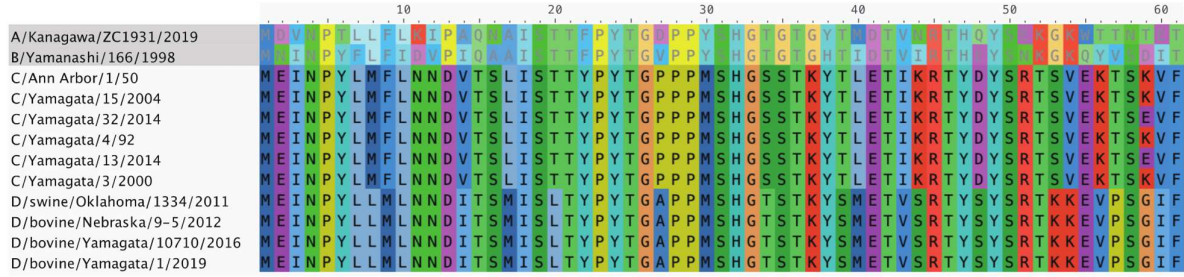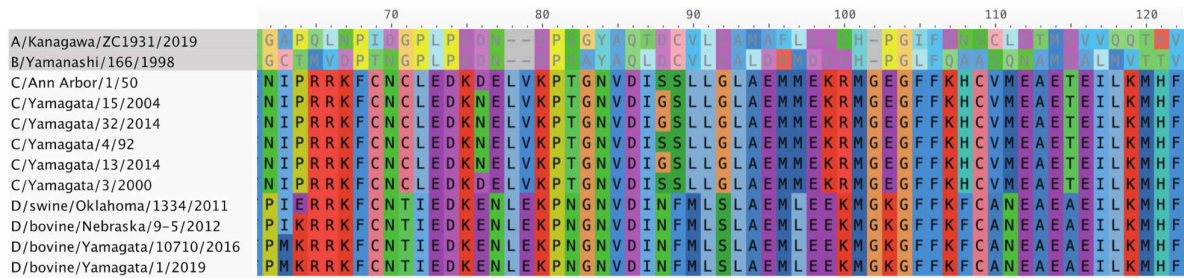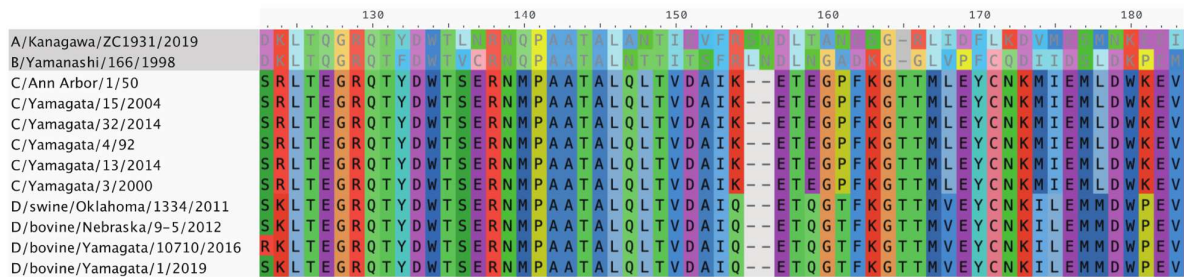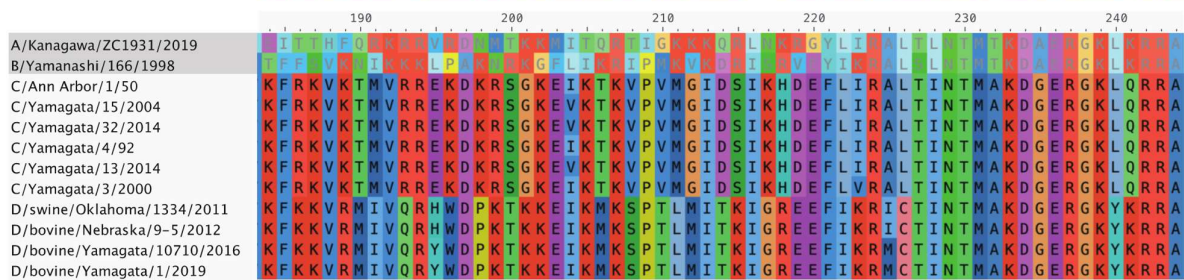

(b)

**Figure S1.** Amino acid alignment of selected regions of the P3 (a) and PB1 (b) proteins of the influenza C and D viruses used in this study. A/Kanagawa/ZC1931/2019(H1N1)pdm09 and B/Yamanashi/166/1998 were used as reference strains. Isolate IDs of A/Kanagawa/ZC1931/2019(H1N1)pdm09 and B/Yamanashi/166/1998 in the GISAID EpiFlu Database (<https://gisaid.org>) are EPI\_ISL\_403549 and EPI\_ISL\_20976, respectively. Arrows indicate positions 38 and 231, respectively.
